# Supplementary material for: Size polymorphism and low sequence diversity in the locus encoding the Plasmodium vivax rhoptry neck protein 4 (PvRON4) in Colombian isolates
Source: Springer Nature journal article supplement (doi:10.1186/s12936-016-1563-4), 2016-10-18
Supplement: MOESM2 [file 10899172]

Size polymorphism and low sequence diversity in the locus encoding the *Plasmodium vivax* rophry neck protein 4 (PvRON4) in Colombian isolates

Additional file 2. Aligning the 32 haplotypes identified for *pvron4*.

```
                *      20      *      40      *      60      *      80      *      100
H1_VCG          : ATGTCTCGTAAAAGGGTTTTCTTCTGTGCATTTTTCTGGCCATTTCCGCCGTTGTTGACGAAGCCGAGTCGTTTCAGGAGTAAGCAAAAAGAAAGGAAAAAAAAA : 104
H2              : ATGTCTCGTAAAAGGGTTTTCTTCTGTGCATTTTTCTGGCCATTTCCGCCGTTGTTGACGAAGCCGAGTCGTTTCAGGAGTAAGCAAAAAGAAAGGAAAAAAAAA : 104
H3              : ATGTCTCGTAAAAGGGTTTTCTTCTGTGCATTTTTCTGGCCATTTCCGCCGTTGTTGACGAAGCCGAGTCGTTTCAGGAGTAAGCAAAAAGAAAGGAAAAAAAAA : 104
H4              : ATGTCTCGTAAAAGGGTTTTCTTCTGTGCATTTTTCTGGCCATTTCCGCCGTTGTTGACGAAGCCGAGTCGTTTCAGGAGTAAGCAAAAAGAAAGGAAAAAAAAA : 104
H5              : ATGTCTCGTAAAAGGGTTTTCTTCTGTGCATTTTTCTGGCCATTTCCGCCGTTGTTGACGAAGCCGAGTCGTTTCAGGAGTAAGCAAAAAGAAAGGAAAAAAAAA : 104
H6              : ATGTCTCGTAAAAGGGTTTTCTTCTGTGCATTTTTCTGGCCATTTCCGCCGTTGTTGACGAAGCCGAGTCGTTTCAGGAGTAAGCAAAAAGAAAGGAAAAAAAAA : 104
H7              : ATGTCTCGTAAAAGGGTTTTCTTCTGTGCATTTTTCTGGCCATTTCCGCCGTTGTTGACGAAGCCGAGTCGTTTCAGGAGTAAGCAAAAAGAAAGGAAAAAAAAA : 104
H8              : ATGTCTCGTAAAAGGGTTTTCTTCTGTGCATTTTTCTGGCCATTTCCGCCGTTGTTGACGAAGCCGAGTCGTTTCAGGAGTAAGCAAAAAGAAAGGAAAAAAAAA : 104
H9              : ATGTCTCGTAAAAGGGTTTTCTTCTGTGCATTTTTCTGGCCATTTCCGCCGTTGTTGACGAAGCCGAGTCGTTTCAGGAGTAAGCAAAAAGAAAGGAAAAAAAAA : 104
H10             : ATGTCTCGTAAAAGGGTTTTCTTCTGTGCATTTTTCTGGCCATTTCCGCCGTTGTTGACGAAGCCGAGTCGTTTCAGGAGTAAGCAAAAAGAAAGGAAAAAAAAA : 104
H11             : ATGTCTCGTAAAAGGGTTTTCTTCTGTGCATTTTTCTGGCCATTTCCGCCGTTGTTGACGAAGCCGAGTCGTTTCAGGAGTAAGCAAAAAGAAAGGAAAAAAAAA : 104
H12             : ATGTCTCGTAAAAGGGTTTTCTTCTGTGCATTTTTCTGGCCATTTCCGCCGTTGTTGACGAAGCCGAGTCGTTTCAGGAGTAAGCAAAAAGAAAGGAAAAAAAAA : 104
H13             : ATGTCTCGTAAAAGGGTTTTCTTCTGTGCATTTTTCTGGCCATTTCCGCCGTTGTTGACGAAGCCGAGTCGTTTCAGGAGTAAGCAAAAAGAAAGGAAAAAAAAA : 104
H14             : ATGTCTCGTAAAAGGGTTTTCTTCTGTGCATTTTTCTGGCCATTTCCGCCGTTGTTGACGAAGCCGAGTCGTTTCAGGAGTAAGCAAAAAGAAAGGAAAAAAAAA : 104
H15             : ATGTCTCGTAAAAGGGTTTTCTTCTGTGCATTTTTCTGGCCATTTCCGCCGTTGTTGACGAAGCCGAGTCGTTTCAGGAGTAAGCAAAAAGAAAGGAAAAAAAAA : 104
H16             : ATGTCTCGTAAAAGGGTTTTCTTCTGTGCATTTTTCTGGCCATTTCCGCCGTTGTTGACGAAGCCGAGTCGTTTCAGGAGTAAGCAAAAAGAAAGGAAAAAAAAA : 104
H17             : ATGTCTCGTAAAAGGGTTTTCTTCTGTGCATTTTTCTGGCCATTTCCGCCGTTGTTGACGAAGCCGAGTCGTTTCAGGAGTAAGCAAAAAGAAAGGAAAAAAAAA : 104
H18             : ATGTCTCGTAAAAGGGTTTTCTTCTGTGCATTTTTCTGGCCATTTCCGCCGTTGTTGACGAAGCCGAGTCGTTTCAGGAGTAAGCAAAAAGAAAGGAAAAAAAAA : 104
H19             : ATGTCTCGTAAAAGGGTTTTCTTCTGTGCATTTTTCTGGCCATTTCCGCCGTTGTTGACGAAGCCGAGTCGTTTCAGGAGTAAGCAAAAAGAAAGGAAAAAAAAA : 104
H20             : ATGTCTCGTAAAAGGGTTTTCTTCTGTGCATTTTTCTGGCCATTTCCGCCGTTGTTGACGAAGCCGAGTCGTTTCAGGAGTAAGCAAAAAGAAAGGAAAAAAAAA : 104
H21             : ATGTCTCGTAAAAGGGTTTTCTTCTGTGCATTTTTCTGGCCATTTCCGCCGTTGTTGACGAAGCCGAGTCGTTTCAGGAGTAAGCAAAAAGAAAGGAAAAAAAAA : 104
H22             : ATGTCTCGTAAAAGGGTTTTCTTCTGTGCATTTTTCTGGCCATTTCCGCCGTTGTTGACGAAGCCGAGTCGTTTCAGGAGTAAGCAAAAAGAAAGGAAAAAAAAA : 104
H23             : ATGTCTCGTAAAAGGGTTTTCTTCTGTGCATTTTTCTGGCCATTTCCGCCGTTGTTGACGAAGCCGAGTCGTTTCAGGAGTAAGCAAAAAGAAAGGAAAAAAAAA : 104
H24             : ATGTCTCGTAAAAGGGTTTTCTTCTGTGCATTTTTCTGGCCATTTCCGCCGTTGTTGACGAAGCCGAGTCGTTTCAGGAGTAAGCAAAAAGAAAGGAAAAAAAAA : 104
H25             : ATGTCTCGTAAAAGGGTTTTCTTCTGTGCATTTTTCTGGCCATTTCCGCCGTTGTTGACGAAGCCGAGTCGTTTCAGGAGTAAGCAAAAAGAAAGGAAAAAAAAA : 104
H26_Mauritania-I_ref : ATGTCTCGTAAAAGGGTTTTCTTCTGTGCATTTTTCTGGCCATTTCCGCCGTTGTTGACGAAGCCGAGTCGTTTCAGGAGTAAGCAAAAAGAAAGGAAAAAAAAA : 104
H27_India-VII_refseq : ATGTCTCGTAAAAGGGTTTTCTTCTGTGCATTTTTCTGGCCATTTCCGCCGTTGTTGACGAAGCCGAGTCGTTTCAGGAGTAAGCAAAAAGAAAGGAAAAAAAAA : 104
H28_Ctg_refsequence : ATGTCTCGTAAAAGGGTTTTCTTCTGTGCATTTTTCTGGCCATTTCCGCCGTTGTTGACGAAGCCGAGTCGTTTCAGGAGTAAGCAAAAAGAAAGGAAAAAAAAA : 104
H29_Salvador-I_refse : ATGTCTCGTAAAAGGGTTTTCTTCTGTGCATTTTTCTGGCCATTTCCGCCGTTGTTGACGAAGCCGAGTCGTTTCAGGAGTAAGCAAAAAGAAAGGAAAAAAAAA : 104
H30_NKorea_refsequen : ATGTCTCGTAAAAGGGTTTTCTTCTGTGCATTTTTCTGGCCATTTCCGCCGTTGTTGACGAAGCCGAGTCGTTTCAGGAGTAAGCAAAAAGAAAGGAAAAAAAAA : 104
H31_P.vivax01_refseq : ATGTCTCGTAAAAGGGTTTTCTTCTGTGCATTTTTCTGGCCATTTCCGCCGTTGTTGACGAAGCCGAGTCGTTTCAGGAGTAAGCAAAAAGAAAGGAAAAAAAAA : 104
H32_Brazil-I_refsequ : ATGTCTCGTAAAAGGGTTTTCTTCTGTGCATTTTTCTGGCCATTTCCGCCGTTGTTGACGAAGCCGAGTCGTTTCAGGAGTAAGCAAAAAGAAAGGAAAAAAAAA : 104
ATGTCTCGTAAAAGGGTTTTCTTCTGTGCATTTTTCTGGCCATTTCCGCCGTTGTTGACGAAGCCGAGTCGTTTCAGGAGTAAGCAAAAAGAAAGGAAAAAAAAA
```

```
                *      120      *      140      *      160      *      180      *      200
H1_VCG          : GGAGAGATAGGTAGAGAGGGGCATCACACGCAACTGCTATACGCATGCAACTGCCGATACGCACGTGACTGCGGTACACACCTGTGCAATGGCGCGTGCCGTATG : 208
H2              : GGAGAGATAGGTAGAGAGGGGCATCACACGCAACTGCTATACGCATGCAACTGCCGATACGCACGTGACTGCGGTACACACCTGTGCAATGGCGCGTGCCGTATG : 208
H3              : GGAGAGATAGGTAGAGAGGGGCATCACACGCAACTGCTATACGCATGCAACTGCCGATACGCACGTGACTGCGGTACACACCTGTGCAATGGCGCGTGCCGTATG : 208
H4              : GGAGAGATAGGTAGAGAGGGGCATCACACGCAACTGCTATACGCATGCAACTGCCGATACGCACGTGACTGCGGTACACACCTGTGCAATGGCGCGTGCCGTATG : 208
H5              : GGAGAGATAGGTAGAGAGGGGCATCACACGCAACTGCTATACGCATGCAACTGCCGATACGCACGTGACTGCGGTACACACCTGTGCAATGGCGCGTGCCGTATG : 208
H6              : GGAGAGATAGGTAGAGAGGGGCATCACACGCAACTGCTATACGCATGCAACTGCCGATACGCACGTGACTGCGGTACACACCTGTGCAATGGCGCGTGCCGTATG : 208
H7              : GGAGAGATAGGTAGAGAGGGGCATCACACGCAACTGCTATACGCATGCAACTGCCGATACGCACGTGACTGCGGTACACACCTGTGCAATGGCGCGTGCCGTATG : 208
```









TGAAAGCAGCACACGGGCTCACACTCAGATAAGGA<sub>g</sub>GAGCTGGACTTGTATACGTCTCCCCCTCCGATAAAGAAGAAAACAGCGCCCTGCCATGGGTGGTA

|                      |   |                                                                                  |     |   |     |   |     |   |     |   |     |   |   |     |
|----------------------|---|----------------------------------------------------------------------------------|-----|---|-----|---|-----|---|-----|---|-----|---|---|-----|
|                      |   | *                                                                                | 740 | * | 760 | * | 780 | * | 800 | * | 820 | * |   |     |
| H1_VCG               | : | TGCACAACACGGTAGGCCTGAGGGGGGAAGCGCCTCTGAATCGGCGGCCCCAAGTGAAGAGAAAGCATCCGAAGAGAATG |     |   |     |   |     |   |     |   |     |   | : | 832 |
| H2                   | : | TGCACAACACGGTAGGCCTGAGGGGGGAAGCGCCTCTGAATCGGCGGCCCCAAGTGAAGAGAAAGCATCCGAAGAGAATG |     |   |     |   |     |   |     |   |     |   | : | 832 |
| H3                   | : | TGCACAACACGGTAGGCCTGAGGGGGGAAGCGCCTCTGAATCGGCGGCCCCAAGTGAAGAGAAAGCATCCGAAGAGAATG |     |   |     |   |     |   |     |   |     |   | : | 832 |
| H4                   | : | TGCACAACACGGTAGGCCTGAGGGGGGAAGCGCCTCTGAATCGGCGGCCCCAAGTGAAGAGAAAGCATCCGAAGAGAATG |     |   |     |   |     |   |     |   |     |   | : | 832 |
| H5                   | : | TGCACAACACGGTAGGCCTGAGGGGGGAAGCGCCTCTGAATCGGCGGCCCCAAGTGAAGAGAAAGCATCCGAAGAGAATG |     |   |     |   |     |   |     |   |     |   | : | 832 |
| H6                   | : | TGCACAACACGGTAGGCCTGAGGGGGGAAGCGCCTCTGAATCGGCGGCCCCAAGTGAAGAGAAAGCATCCGAAGAGAATG |     |   |     |   |     |   |     |   |     |   | : | 832 |
| H7                   | : | TGCACAACACGGTAGGCCTGAGGGGGGAAGCGCCTCTGAATCGGCGGCCCCAAGTGAAGAGAAAGCATCCGAAGAGAATG |     |   |     |   |     |   |     |   |     |   | : | 832 |
| H8                   | : | TGCACAACACGGTAGGCCTGAGGGGGGAAGCGCCTCTGAATCGGCGGCCCCAAGTGAAGAGAAAGCATCCGAAGAGAATG |     |   |     |   |     |   |     |   |     |   | : | 832 |
| H9                   | : | TGCACAACACGGTAGGCCTGAGGGGGGAAGCGCCTCTGAATCGGCGGCCCCAAGTGAAGAGAAAGCATCCGAAGAGAATG |     |   |     |   |     |   |     |   |     |   | : | 815 |
| H10                  | : | TGCACAACACGGTAGGCCTGAGGGGGGAAGCGCCTCTGAATCGGCGGCCCCAAGTGAAGAGAAAGCATCCGAAGAGAATG |     |   |     |   |     |   |     |   |     |   | : | 832 |
| H11                  | : | TGCACAACACGGTAGGCCTGAGGGGGGAAGCGCCTCTGAATCGGCGGCCCCAAGTGAAGAGAAAGCATCCGAAGAGAATG |     |   |     |   |     |   |     |   |     |   | : | 832 |
| H12                  | : | TGCACAACACGGTAGGCCTGAGGGGGGAAGCGCCTCTGAATCGGCGGCCCCAAGTGAAGAGAAAGCATCCGAAGAGAATG |     |   |     |   |     |   |     |   |     |   | : | 832 |
| H13                  | : | TGCACAACACGGTAGGCCTGAGGGGGGAAGCGCCTCTGAATCGGCGGCCCCAAGTGAAGAGAAAGCATCCGAAGAGAATG |     |   |     |   |     |   |     |   |     |   | : | 832 |
| H14                  | : | TGCACAACACGGTAGGCCTGAGGGGGGAAGCGCCTCTGAATCGGCGGCCCCAAGTGAAGAGAAAGCATCCGAAGAGAATG |     |   |     |   |     |   |     |   |     |   | : | 832 |
| H15                  | : | TGCACAACACGGTAGGCCTGAGGGGGGAAGCGCCTCTGAATCGGCGGCCCCAAGTGAAGAGAAAGCATCCGAAGAGAATG |     |   |     |   |     |   |     |   |     |   | : | 832 |
| H16                  | : | TGCACAACACGGTAGGCCTGAGGGGGGAAGCGCCTCTGAATCGGCGGCCCCAAGTGAAGAGAAAGCATCCGAAGAGAATG |     |   |     |   |     |   |     |   |     |   | : | 832 |
| H17                  | : | TGCACAACACGGTAGGCCTGAGGGGGGAAGCGCCTCTGAATCGGCGGCCCCAAGTGAAGAGAAAGCATCCGAAGAGAATG |     |   |     |   |     |   |     |   |     |   | : | 832 |
| H18                  | : | TGCACAACACGGTAGGCCTGAGGGGGGAAGCGCCTCTGAATCGGCGGCCCCAAGTGAAGAGAAAGCATCCGAAGAGAATG |     |   |     |   |     |   |     |   |     |   | : | 832 |
| H19                  | : | TGCACAACACGGTAGGCCTGAGGGGGGAAGCGCCTCTGAATCGGCGGCCCCAAGTGAAGAGAAAGCATCCGAAGAGAATG |     |   |     |   |     |   |     |   |     |   | : | 832 |
| H20                  | : | TGCACAACACGGTAGGCCTGAGGGGGGAAGCGCCTCTGAATCGGCGGCCCCAAGTGAAGAGAAAGCATCCGAAGAGAATG |     |   |     |   |     |   |     |   |     |   | : | 832 |
| H21                  | : | TGCACAACACGGTAGGCCTGAGGGGGGAAGCGCCTCTGAATCGGCGGCCCCAAGTGAAGAGAAAGCATCCGAAGAGAATG |     |   |     |   |     |   |     |   |     |   | : | 832 |
| H22                  | : | TGCACAACACGGTAGGCCTGAGGGGGGAAGCGCCTCTGAATCGGCGGCCCCAAGTGAAGAGAAAGCATCCGAAGAGAATG |     |   |     |   |     |   |     |   |     |   | : | 832 |
| H23                  | : | TGCACAACACGGTAGGCCTGAGGGGGGAAGCGCCTCTGAATCGGCGGCCCCAAGTGAAGAGAAAGCATCCGAAGAGAATG |     |   |     |   |     |   |     |   |     |   | : | 832 |
| H24                  | : | TGCACAACACGGTAGGCCTGAGGGGGGAAGCGCCTCTGAATCGGCGGCCCCAAGTGAAGAGAAAGCATCCGAAGAGAATG |     |   |     |   |     |   |     |   |     |   | : | 832 |
| H25                  | : | TGCACAACACGGTAGGCCTGAGGGGGGAAGCGCCTCTGAATCGGCGGCCCCAAGTGAAGAGAAAGCATCCGAAGAGAATG |     |   |     |   |     |   |     |   |     |   | : | 832 |
| H26_Mauritania-I_ref | : | TGCACAACACGGTAGGCCTGAGGGGGGAAGCGCCTCTGAATCGGCGGCCCCAAGTGAAGAGAAAGCATCCGAAGAGAATG |     |   |     |   |     |   |     |   |     |   | : | 814 |
| H27_India-VII_refseq | : | TGCACAACACGGTAGGCCTGAGGGGGGAAGCGCCTCTGAATCGGCGGCCCCAAGTGAAGAGAAAGCATCCGAAGAGAATG |     |   |     |   |     |   |     |   |     |   | : | 832 |
| H28_Ctg_refsequence  | : | TGCACAACACGGTAGGCCTGAGGGGGGAAGCGCCTCTGAATCGGCGGCCCCAAGTGAAGAGAAAGCATCCGAAGAGAATG |     |   |     |   |     |   |     |   |     |   | : | 832 |
| H29_Salvador-I_refse | : | TGCACAACACGGTAGGCCTGAGGGGGGAAGCGCCTCTGAATCGGCGGCCCCAAGTGAAGAGAAAGCATCCGAAGAGAATG |     |   |     |   |     |   |     |   |     |   | : | 832 |
| H30_NKorea_refsequen | : | TGCACAACACGGTAGGCCTGAGGGGGGAAGCGCCTCTGAATCGGCGGCCCCAAGTGAAGAGAAAGCATCCGAAGAGAATG |     |   |     |   |     |   |     |   |     |   | : | 832 |
| H31_P.vivax01_refseq | : | TGCACAACACGGTAGGCCTGAGGGGGGAAGCGCCTCTGAATCGGCGGCCCCAAGTGAAGAGAAAGCATCCGAAGAGAATG |     |   |     |   |     |   |     |   |     |   | : | 832 |
| H32_Brazil-I_refsequ | : | TGCACAACACGGTAGGCCTGAGGGGGGAAGCGCCTCTGAATCGGCGGCCCCAAGTGAAGAGAAAGCATCCGAAGAGAATG |     |   |     |   |     |   |     |   |     |   | : | 832 |
|                      | : | TGCACAACACGGTAGGCCTGAGGGGGGAAGCGCCTCTGAATCGGCGGCCCCAAGTGAAGAGAAAGCATCCGAAGAGAATG |     |   |     |   |     |   |     |   |     |   | : | 832 |

|        |   |                                                                     |     |   |     |   |     |   |     |   |     |   |   |     |
|--------|---|---------------------------------------------------------------------|-----|---|-----|---|-----|---|-----|---|-----|---|---|-----|
|        |   |                                                                     | 840 | * | 860 | * | 880 | * | 900 | * | 920 | * |   |     |
| H1_VCG | : | AATGGGGAGGACACCTCACAGGAGGGTTCCCACGCGGGAGCGCTGTACCTGCGCATGTGGGTGGCGA |     |   |     |   |     |   |     |   |     |   | : | 927 |
| H2     | : | AATGGGGAGGACACCTCACAGGAGGGTTCCCACGCGGGAGCGCTGTACCTGCGCATGTGGGTGGCGA |     |   |     |   |     |   |     |   |     |   | : | 927 |
| H3     | : | AATGGGGAGGACACCTCACAGGAGGGTTCCCACGCGGGAGCGCTGTACCTGCGCATGTGGGTGGCGA |     |   |     |   |     |   |     |   |     |   | : | 927 |
| H4     | : | AATGGGGAGGACACCTCACAGGAGGGTTCCCACGCGGGAGCGCTGTACCTGCGCATGTGGGTGGCGA |     |   |     |   |     |   |     |   |     |   | : | 927 |
| H5     | : | AATGGGGAGGACACCTCACAGGAGGGTTCCCACGCGGGAGCGCTGTACCTGCGCATGTGGGTGGCGA |     |   |     |   |     |   |     |   |     |   | : | 927 |
| H6     | : | AATGGGGAGGACACCTCACAGGAGGGTTCCCACGCGGGAGCGCTGTACCTGCGCATGTGGGTGGCGA |     |   |     |   |     |   |     |   |     |   | : | 918 |
| H7     | : | AATGGGGAGGACACCTCACAGGAGGGTTCCCACGCGGGAGCGCTGTACCTGCGCATGTGGGTGGCGA |     |   |     |   |     |   |     |   |     |   | : | 936 |
| H8     | : | AATGGGGAGGACACCTCACAGGAGGGTTCCCACGCGGGAGCGCTGTACCTGCGCATGTGGGTGGCGA |     |   |     |   |     |   |     |   |     |   | : | 936 |
| H9     | : | AATGGGGAGGACACCTCACAGGAGGGTTCCCACGCGGGAGCGCTGTACCTGCGCATGTGGGTGGCGA |     |   |     |   |     |   |     |   |     |   | : | 910 |
| H10    | : | AATGGGGAGGACACCTCACAGGAGGGTTCCCACGCGGGAGCGCTGTACCTGCGCATGTGGGTGGCGA |     |   |     |   |     |   |     |   |     |   | : | 936 |
| H11    | : | AATGGGGAGGACACCTCACAGGAGGGTTCCCACGCGGGAGCGCTGTACCTGCGCATGTGGGTGGCGA |     |   |     |   |     |   |     |   |     |   | : | 927 |
| H12    | : | AATGGGGAGGACACCTCACAGGAGGGTTCCCACGCGGGAGCGCTGTACCTGCGCATGTGGGTGGCGA |     |   |     |   |     |   |     |   |     |   | : | 927 |



```

H28_Ctg_refsequence : AGAGCACGGTGAACACGCTGAACATGGGGAGCACGGAGAGCACGG----- : 972
H29_Salvador-I_refse : AGAGCACGGTGAACACGCTGAACATGGGGAGCACGG----- : 964
H30_NKorea_refsequen : AGAGCACGGTGAACACGCTGAACATGGGGAGCACGGAGAGCACGGT----- : 964
H31_P.vivax01_refseq : -----TGAACACGCTGAACATGGGGAGCACGGAGAGCACGGTGAACA-----CGCTGAACATGGGGAGCAC : 979
H32_Brazil-I_refsequ : AGAGCACGGTGAACACGCTGAACATGGGGAGCACGGAGAGCACGGTGAACATGGCAGAGCACGGTGAACA----- : 996
                        agagcacggtGAACACGCTGAACATGGGGAGCACGGGA                        gagcacggtgaaca

```

```

                        *      1060      *      1080      *      1100      *      1120      *      1140
H1_VCG : ----- : -
H2 : GGAGAGCACGGTGAA----- : 1012
H3 : GGAGAGCACGGTGAA----- : 1012
H4 : GGAGAGCACGGTGAA----- : 1012
H5 : GGAGAGCACGGTGAA----- : 1012
H6 : ----- : -
H7 : ----- : -
H8 : GGAGAGCACGGTGAACAT----- : 1024
H9 : GGAGAGCACGGTGAA----- : 995
H10 : GGAGAGCACGGTGAA----- : 1021
H11 : GGAGAGCACGGTGAA----- : 1012
H12 : GGAGAGCACGGTGAACAT----- : 1015
H13 : GGAGAGCACGGTGAA----- : 1012
H14 : GGAGAGCACGGTGAA----- : 1012
H15 : GGAGAGCACGGTGAA----- : 1012
H16 : ----- : -
H17 : GGAGAGCACGGTGAA-----CACGCTGA : 1020
H18 : ----- : -
H19 : GGAGAGCACGGTGAA----- : 1012
H20 : GGAGAGCACGGTGAA----- : 1012
H21 : GGAGAGCACGGTGAA----- : 1012
H22 : GGAGAGCACGGTGAA----- : 1012
H23 : GGAGAGCACGGTGAA----- : 1012
H24 : GGAGAGCACGGTGAA----- : 1021
H25 : GGAGAGCACGGTGAA----- : 1012
H26_Mauritania-I_ref : GGAGAGCACGGTGAACATGGGTGAGCATGGTGAGCACGGTGAGCATGGTGAGCATGGTGAGCACGGTGAACATGGTGAGCATGGGGAGCACGGTGAG----- : 1066
H27_India-VII_refseq : ----- : -
H28_Ctg_refsequence : ----- : -
H29_Salvador-I_refse : ----- : -
H30_NKorea_refsequen : ----- : -
H31_P.vivax01_refseq : GGAGAGCACGGTGAA----- : 994
H32_Brazil-I_refsequ : ----- : -

```

```

                        *      1160      *      1180      *      1200      *      1220      *      1240
H1_VCG : ----- : -
H2 : ----- : -
H3 : -----CACG : 1016
H4 : ----- : -
H5 : ----- : -
H6 : ----- : -
H7 : ----- : -

```



```

H8      : ----- : -
H9      : -----CACGCTGAACATGGGGAGCACGGAGAGCACGGTGAACACG : 1035
H10     : ----- : -
H11     : ----- : -
H12     : ----- : -
H13     : -----CACG : 1016
H14     : ----- : -
H15     : ----- : -
H16     : ----- : -
H17     : ACATGGGGAGCACGGAGAGCACGGTGAACACGCTGAACATGGGGAGCACGGAGAGCACGGTGAACACGCTGAACATGGGGAGCACGGAGAGCACGGTGAACACG : 1124
H18     : ----- : -
H19     : ----- : -
H20     : ----- : -
H21     : ----- : -
H22     : ----- : -
H23     : ----- : -
H24     : ----- : -
H25     : ----- : -
H26_Mauritania-I_ref : ----- : -
H27_India-VII_refseq : ----- : -
H28_Ctg_refsequence : -----AGAGCACGGTGAACACG : 989
H29_Salvador-I_refse : -----GAGCACGGAGAGCACGGTGAACACG : 989
H30_NKorea_refsequen : ----- : -
H31_P.vivax01_refseq : ----- : -
H32_Brazil-I_refsequ : ----- : -

```

```

*      1260      *      1280      *      1300      *      1320      *      1340      *
H1_VCG : -----TGCTGAACAGGAGGAG : 1012
H2      : -----CATGGCGAGCACGGTGAACATGCTGAACAGGAGGAG : 1048
H3      : CTGAACATGGGGAGCACGGAGAGCACGGTGAACACGCTGAACATGGGGAGCACGGAGAGCACGGTGAACATGGCGAGCACGGTGAACATGCTGAACAGGAGGAG : 1120
H4      : -----CACGCTGAACATGGGGAGCACGGAGAGCACGGTGAACATGGCGAGCACGGTGAACATGCTGAACAGGAGGAG : 1084
H5      : -----CACGCTGAACATGGGGAGCACGGAGAGCACGGTGAACATGGCGAGCACGGTGAACATGCTGAACAGGAGGAG : 1084
H6      : -----CATGCTGAACAGGAGGAG : 1003
H7      : -----TGCTGAACAGGAGGAG : 1021
H8      : -----GGCGAGCACGGTGAACATGCTGAACAGGAGGAG : 1057
H9      : CTGAACATGGGGAGCACGGAGAGCACGGTGAACACGCTGAACATGGGGAGCACGGAGAGCACGGTGAACATGGCGAGCACGGTGAACATGCTGAACAGGAGGAG : 1139
H10     : -----CATGGCGAGCACGGTGAACATGCTGAACAGGAGGAG : 1057
H11     : -----CACGCTGAACATGGGGAGCACGGAGA-----GCACGGTGAACATGCTGAACAGGAGGAG : 1066
H12     : -----GGCGAGCACGGTGAACATGCTGAACAGGAGGAG : 1048
H13     : CTGAACATGGGGAGCACGGAGAGCACGGTGAACACGCTGAACATGGGGAGCACGGAGAGCACGGTGAACATGGCGAGCACGGTGAACATGCTGAACAGGAGGAG : 1120
H14     : -----CACGCTGAACATGGGGAGCACGGAGA-----GCACGGTGAACATGCTGAACAGGAGGAG : 1066
H15     : -----CATGGCGAGCACGGTGAACATGCTGAACAGGAGGAG : 1048
H16     : -----CATGCTGAACAGGAGGAG : 1012
H17     : CTGAACATGGGGAGCACGGAGAGCACGGTGAACACGCTGAACATGGGGAGCACGGAGAGCACGGTGAACATGGCGAGCACGGTGAACATGCTGAACAGGAGGAG : 1228
H18     : -----CATGCTGAACAGGAGGAG : 1012
H19     : -----CACGCTGAACATGGGGAGCACGGAGAGCACGGTGAACATGGCGAGCACGGTGAACATGCTGAACAGGAGGAG : 1066
H20     : -----CATGGCGAGCACGGTGAACATGCTGAACAGGAGGAG : 1048
H21     : -----CACGCTGAACATGGGGAGCACGGAGAGCACGGTGAACATGGCGAGCACGGTGAACATGCTGAACAGGAGGAG : 1084
H22     : -----CATGGCGAGCACGGTGAACATGCTGAACAGGAGGAG : 1048

```

H23 : -----CACGCTGAACATGGGGAGCACGGAGAGCACGGTGAACATGGCGAGCACGGTGAACATGCTGAACAGGAGGAG : 1084  
H24 : -----CACGCTGAACATGGGGAGCACGGAGAGCACGGTGAACATGGCGAGCACGGTGAACATGCTGAACAGGAGGAG : 1093  
H25 : -----CATGGCGAGCACGGTGAACATGCTGAACAGGAGGAG : 1048  
H26\_Mauritania-I\_ref : -----CACGCTGAACATGGGGAGCACGGAGAGCACGGTGAACATGGCGAGCACGGTGAACATGCTGAACAGGAGGAG : 1138  
H27\_India-VII\_refseq : -----CATGGCGAGCACGGTGAACATGCTGAACAGGAGGAG : 1021  
H28\_Ctg\_refsequence : CTGAACATGGGGAGCACGGAGAGCACGGTGAACACGCTGAACATGGGGAGCACGGAGAGCACGGTGAACATGGCGAGCACGGTGAACATGCTGAACAGGAGGAG : 1093  
H29\_Salvador-I\_refseq : CTGAACATGGGGAGCACGGAGAGCACGGTGAACACGCTGAACATGGGGAGCACGGAGAGCACGGTGAACATGGCGAGCACGGTGAACATGCTGAACAGGAGGAG : 1093  
H30\_NKorea\_refsequen : -----GAACATGGCGAGCACGGTGAACATGCTGAACAGGAGGAG : 1003  
H31\_P.vivax01\_refseq : -----CATGGCGAGCACGGTGAACACGCTGAACATGGGGAGCACGGAGAGCACGGTGAACATGGCGAGCACGGTGAACATGCTGAACAGGAGGAG : 1084  
H32\_Brazil-I\_refsequ : -----TGCTGAACAGGAGGAG : 1012  
caTGCTGAACAGGAGGAG

1360 \* 1380 \* 1400 \* 1420 \* 1440 \*  
H1\_VCG : CACCAAATCTATGGGACGATTACCCCCGAGGCGGAAGCCTCCATTTTCCCCGCGCTGAAGGAAAAGGGCATCCACGTGTCCAGCCCAGAAAGGGTAATCCTCGA : 1116  
H2 : CACCAAATCTATGGGACGATTACCCCCGAGGCGGAAGCCTCCATTTTCCCCGCGCTGAAGGAAAAGGGCATCCACGTGTCCAGCCCAGAAAGGGTAATCCTCGA : 1152  
H3 : CACCAAATCTATGGGACGATTACCCCCGAGGCGGAAGCCTCCATTTTCCCCGCGCTGAAGGAAAAGGGCATCCACGTGTCCAGCCCAGAAAGGGTAATCCTCGA : 1224  
H4 : CACCAAATCTATGGGACGATTACCCCCGAGGCGGAAGCCTCCATTTTCCCCGCGCTGAAGGAAAAGGGCATCCACGTGTCCAGCCCAGAAAGGGTAATCCTCGA : 1188  
H5 : CACCAAATCTATGGGACGATTACCCCCGAGGCGGAAGCCTCCATTTTCCCCGCGCTGAAGGAAAAGGGCATCCACGTGTCCAGCCCAGAAAGGGTAATCCTCGA : 1188  
H6 : CACCAAATCTATGGGACGATTACCCCCGAGGCGGAAGCCTCCATTTTCCCCGCGCTGAAGGAAAAGGGCATCCACGTGTCCAGCCCAGAAAGGGTAATCCTCGA : 1107  
H7 : CACCAAATCTATGGGACGATTACCCCCGAGGCGGAAGCCTCCATTTTCCCCGCGCTGAAGGAAAAGGGCATCCACGTGTCCAGCCCAGAAAGGGTAATCCTCGA : 1125  
H8 : CACCAAATCTATGGGACGATTACCCCCGAGGCGGAAGCCTCCATTTTCCCCGCGCTGAAGGAAAAGGGCATCCACGTGTCCAGCCCAGAAAGGGTAATCCTCGA : 1161  
H9 : CACCAAATCTATGGGACGATTACCCCCGAGGCGGAAGCCTCCATTTTCCCCGCGCTGAAGGAAAAGGGCATCCACGTGTCCAGCCCAGAAAGGGTAATCCTCGA : 1243  
H10 : CACCAAATCTATGGGACGATTACCCCCGAGGCGGAAGCCTCCATTTTCCCCGCGCTGAAGGAAAAGGGCATCCACGTGTCCAGCCCAGAAAGGGTAATCCTCGA : 1161  
H11 : CACCAAATCTATGGGACGATTACCCCCGAGGCGGAAGCCTCCATTTTCCCCGCGCTGAAGGAAAAGGGCATCCACGTGTCCAGCCCAGAAAGGGTAATCCTCGA : 1170  
H12 : CACCAAATCTATGGGACGATTACCCCCGAGGCGGAAGCCTCCATTTTCCCCGCGCTGAAGGAAAAGGGCATCCACGTGTCCAGCCCAGAAAGGGTAATCCTCGA : 1152  
H13 : CACCAAATCTATGGGACGATTACCCCCGAGGCGGAAGCCTCCATTTTCCCCGCGCTGAAGGAAAAGGGCATCCACGTGTCCAGCCCAGAAAGGGTAATCCTCGA : 1224  
H14 : CACCAAATCTATGGGACGATTACCCCCGAGGCGGAAGCCTCCATTTTCCCCGCGCTGAAGGAAAAGGGCATCCACGTGTCCAGCCCAGAAAGGGTAATCCTCGA : 1170  
H15 : CACCAAATCTATGGGACGATTACCCCCGAGGCGGAAGCCTCCATTTTCCCCGCGCTGAAGGAAAAGGGCATCCACGTGTCCAGCCCAGAAAGGGTAATCCTCGA : 1152  
H16 : CACCAAATCTATGGGACGATTACCCCCGAGGCGGAAGCCTCCATTTTCCCCGCGCTGAAGGAAAAGGGCATCCACGTGTCCAGCCCAGAAAGGGTAATCCTCGA : 1116  
H17 : CACCAAATCTATGGGACGATTACCCCCGAGGCGGAAGCCTCCATTTTCCCCGCGCTGAAGGAAAAGGGCATCCACGTGTCCAGCCCAGAAAGGGTAATCCTCGA : 1332  
H18 : CACCAAATCTATGGGACGATTACCCCCGAGGCGGAAGCCTCCATTTTCCCCGCGCTGAAGGAAAAGGGCATCCACGTGTCCAGCCCAGAAAGGGTAATCCTCGA : 1116  
H19 : CACCAAATCTATGGGACGATTACCCCCGAGGCGGAAGCCTCCATTTTCCCCGCGCTGAAGGAAAAGGGCATCCACGTGTCCAGCCCAGAAAGGGTAATCCTCGA : 1170  
H20 : CACCAAATCTATGGGACGATTACCCCCGAGGCGGAAGCCTCCATTTTCCCCGCGCTGAAGGAAAAGGGCATCCACGTGTCCAGCCCAGAAAGGGTAATCCTCGA : 1152  
H21 : CACCAAATCTATGGGACGATTACCCCCGAGGCGGAAGCCTCCATTTTCCCCGCGCTGAAGGAAAAGGGCATCCACGTGTCCAGCCCAGAAAGGGTAATCCTCGA : 1188  
H22 : CACCAAATCTATGGGACGATTACCCCCGAGGCGGAAGCCTCCATTTTCCCCGCGCTGAAGGAAAAGGGCATCCACGTGTCCAGCCCAGAAAGGGTAATCCTCGA : 1152  
H23 : CACCAAATCTATGGGACGATTACCCCCGAGGCGGAAGCCTCCATTTTCCCCGCGCTGAAGGAAAAGGGCATCCACGTGTCCAGCCCAGAAAGGGTAATCCTCGA : 1188  
H24 : CACCAAATCTATGGGACGATTACCCCCGAGGCGGAAGCCTCCATTTTCCCCGCGCTGAAGGAAAAGGGCATCCACGTGTCCAGCCCAGAAAGGGTAATCCTCGA : 1197  
H25 : CACCAAATCTATGGGACGATTACCCCCGAGGCGGAAGCCTCCATTTTCCCCGCGCTGAAGGAAAAGGGCATCCACGTGTCCAGCCCAGAAAGGGTAATCCTCGA : 1152  
H26\_Mauritania-I\_ref : CACCAAATCTATGGGACGATTACCCCCGAGGCGGAAGCCTCCATTTTCCCCGCGCTGAAGGAAAAGGGCATCCACGTGTCCAGCCCAGAAAGGGTAATCCTCGA : 1242  
H27\_India-VII\_refseq : CACCAAATCTATGGGACGATTACCCCCGAGGCGGAAGCCTCCATTTTCCCCGCGCTGAAGGAAAAGGGCATCCACGTGTCCAGCCCAGAAAGGGTAATCCTCGA : 1125  
H28\_Ctg\_refsequence : CACCAAATCTATGGGACGATTACCCCCGAGGCGGAAGCCTCCATTTTCCCCGCGCTGAAGGAAAAGGGCATCCACGTGTCCAGCCCAGAAAGGGTAATCCTCGA : 1197  
H29\_Salvador-I\_refseq : CACCAAATCTATGGGACGATTACCCCCGAGGCGGAAGCCTCCATTTTCCCCGCGCTGAAGGAAAAGGGCATCCACGTGTCCAGCCCAGAAAGGGTAATCCTCGA : 1197  
H30\_NKorea\_refsequen : CACCAAATCTATGGGACGATTACCCCCGAGGCGGAAGCCTCCATTTTCCCCGCGCTGAAGGAAAAGGGCATCCACGTGTCCAGCCCAGAAAGGGTAATCCTCGA : 1107  
H31\_P.vivax01\_refseq : CACCAAATCTATGGGACGATTACCCCCGAGGCGGAAGCCTCCATTTTCCCCGCGCTGAAGGAAAAGGGCATCCACGTGTCCAGCCCAGAAAGGGTAATCCTCGA : 1188  
H32\_Brazil-I\_refsequ : CACCAAATCTATGGGACGATTACCCCCGAGGCGGAAGCCTCCATTTTCCCCGCGCTGAAGGAAAAGGGCATCCACGTGTCCAGCCCAGAAAGGGTAATCCTCGA : 1116  
CACCAAATCTATGGGACGATTACCCCCGAGGCGGAAGCCTCCATTTTCCCCGCGCTGAAGGAAAAGGGCATCCACGTGTCCAGCCCAGAAAGGGTAATCCTCGA

1460 \* 1480 \* 1500 \* 1520 \* 1540 \* 1560  
H1\_VCG : GATCATCGAAAGCGCCAAGGAGGGAATAAAGGATTGCTGAAGCTCCGGAAGAGCAAAGACACAGGCAAGCTGCTGGAGGAGGCACTAGAAAAGCTAAACATAA : 1220  
H2 : GATCATCGAAAGCGCCAAGGAGGGAATAAAGGATTGCTGAAGCTCCGGAAGAGCAAAGACACAGGCAAGCTGCTGGAGGAGGCACTAGAAAAGCTAAACATAA : 1256





GATGGCCATTTTTACGAAACGTTAGGTTTGAATAAACTCTATACTAAATCAATCGCTGAAAGAAATTTAAAATAAAAAATGTTGAGGACCATTGGAGTGCCATACAC

\* 1780 \* 1800 \* 1820 \* 1840 \* 1860 \*  
H1\_VCG : GAAGCTACCGCCAATCGTTAAGAACAAAGAGAAGGAAAGCACATGTGCTGCGAACAATCTCATCATTAGCATTACATCAAAAAGAGCTAGCTCAACGAATGGCTA : 1532  
H2 : GAAGCTACCGCCAATCGTTAAGAACAAAGAGAAGGAAAGCACATGTGCTGCGAACAATCTCATCATTAGCATTACATCAAAAAGAGCTAGCTCAACGAATGGCTA : 1568  
H3 : GAAGCTACCGCCAATCGTTAAGAACAAAGAGAAGGAAAGCACATGTGCTGCGAACAATCTCATCATTAGCATTACATCAAAAAGAGCTAGCTCAACGAATGGCTA : 1640  
H4 : GAAGCTACCGCCAATCGTTAAGAACAAAGAGAAGGAAAGCACATGTGCTGCGAACAATCTCATCATTAGCATTACATCAAAAAGAGCTAGCTCAACGAATGGCTA : 1604  
H5 : GAAGCTACCGCCAATCGTTAAGAACAAAGAGAAGGAAAGCACATGTGCTGCGAACAATCTCATCATTAGCATTACATCAAAAAGAGCTAGCTCAACGAATGGCTA : 1604  
H6 : GAAGCTACCGCCAATCGTTAAGAACAAAGAGAAGGAAAGCACATGTGCTGCGAACAATCTCATCATTAGCATTACATCAAAAAGAGCTAGCTCAACGAATGGCTA : 1523  
H7 : GAAGCTACCGCCAATCGTTAAGAACAAAGAGAAGGAAAGCACATGTGCTGCGAACAATCTCATCATTAGCATTACATCAAAAAGAGCTAGCTCAACGAATGGCTA : 1541  
H8 : GAAGCTACCGCCAATCGTTAAGAACAAAGAGAAGGAAAGCACATGTGCTGCGAACAATCTCATCATTAGCATTACATCAAAAAGAGCTAGCTCAACGAATGGCTA : 1577  
H9 : GAAGCTACCGCCAATCGTTAAGAACAAAGAGAAGGAAAGCACATGTGCTGCGAACAATCTCATCATTAGCATTACATCAAAAAGAGCTAGCTCAACGAATGGCTA : 1659  
H10 : GAAGCTACCGCCAATCGTTAAGAACAAAGAGAAGGAAAGCACATGTGCTGCGAACAATCTCATCATTAGCATTACATCAAAAAGAGCTAGCTCAACGAATGGCTA : 1577  
H11 : GAAGCTACCGCCAATCGTTAAGAACAAAGAGAAGGAAAGCACATGTGCTGCGAACAATCTCATCATTAGCATTACATCAAAAAGAGCTAGCTCAACGAATGGCTA : 1586  
H12 : GAAGCTACCGCCAATCGTTAAGAACAAAGAGAAGGAAAGCACATGTGCTGCGAACAATCTCATCATTAGCATTACATCAAAAAGAGCTAGCTCAACGAATGGCTA : 1568  
H13 : GAAGCTACCGCCAATCGTTAAGAACAAAGAGAAGGAAAGCACATGTGCTGCGAACAATCTCATCATTAGCATTACATCAAAAAGAGCTAGCTCAACGAATGGCTA : 1640  
H14 : GAAGCTACCGCCAATCGTTAAGAACAAAGAGAAGGAAAGCACATGTGCTGCGAACAATCTCATCATTAGCATTACATCAAAAAGAGCTAGCTCAACGAATGGCTA : 1586  
H15 : GAAGCTACCGCCAATCGTTAAGAACAAAGAGAAGGAAAGCACATGTGCTGCGAACAATCTCATCATTAGCATTACATCAAAAAGAGCTAGCTCAACGAATGGCTA : 1568  
H16 : GAAGCTACCGCCAATCGTTAAGAACAAAGAGAAGGAAAGCACATGTGCTGCGAACAATCTCATCATTAGCATTACATCAAAAAGAGCTAGCTCAACGAATGGCTA : 1532  
H17 : GAAGCTACCGCCAATCGTTAAGAACAAAGAGAAGGAAAGCACATGTGCTGCGAACAATCTCATCATTAGCATTACATCAAAAAGAGCTAGCTCAACGAATGGCTA : 1748  
H18 : GAAGCTACCGCCAATCGTTAAGAACAAAGAGAAGGAAAGCACATGTGCTGCGAACAATCTCATCATTAGCATTACATCAAAAAGAGCTAGCTCAACGAATGGCTA : 1532  
H19 : GAAGCTACCGCCAATCGTTAAGAACAAAGAGAAGGAAAGCACATGTGCTGCGAACAATCTCATCATTAGCATTACATCAAAAAGAGCTAGCTCAACGAATGGCTA : 1586  
H20 : GAAGCTACCGCCAATCGTTAAGAACAAAGAGAAGGAAAGCACATGTGCTGCGAACAATCTCATCATTAGCATTACATCAAAAAGAGCTAGCTCAACGAATGGCTA : 1568  
H21 : GAAGCTACCGCCAATCGTTAAGAACAAAGAGAAGGAAAGCACATGTGCTGCGAACAATCTCATCATTAGCATTACATCAAAAAGAGCTAGCTCAACGAATGGCTA : 1604  
H22 : GAAGCTACCGCCAATCGTTAAGAACAAAGAGAAGGAAAGCACATGTGCTGCGAACAATCTCATCATTAGCATTACATCAAAAAGAGCTAGCTCAACGAATGGCTA : 1568  
H23 : GAAGCTACCGCCAATCGTTAAGAACAAAGAGAAGGAAAGCACATGTGCTGCGAACAATCTCATCATTAGCATTACATCAAAAAGAGCTAGCTCAACGAATGGCTA : 1604  
H24 : GAAGCTACCGCCAATCGTTAAGAACAAAGAGAAGGAAAGCACATGTGCTGCGAACAATCTCATCATTAGCATTACATCAAAAAGAGCTAGCTCAACGAATGGCTA : 1613  
H25 : GAAGCTACCGCCAATCGTTAAGAACAAAGAGAAGGAAAGCACATGTGCTGCGAACAATCTCATCATTAGCATTACATCAAAAAGAGCTAGCTCAACGAATGGCTA : 1568  
H26\_Mauritania-I\_ref : GAAGCTACCGCCAATCGTTAAGAACAAAGAGAAGGAAAGCACATGTGCTGCGAACAATCTCATCATTAGCATTACATCAAAAAGAGCTAGCTCAACGAATGGCTA : 1658  
H27\_India-VII\_refseq : GAAGCTACCGCCAATCGTTAAGAACAAAGAGAAGGAAAGCACATGTGCTGCGAACAATCTCATCATTAGCATTACATCAAAAAGAGCTAGCTCAACGAATGGCTA : 1541  
H28\_Ctg\_refsequence : GAAGCTACCGCCAATCGTTAAGAACAAAGAGAAGGAAAGCACATGTGCTGCGAACAATCTCATCATTAGCATTACATCAAAAAGAGCTAGCTCAACGAATGGCTA : 1613  
H29\_Salvador-I\_refse : GAAGCTACCGCCAATCGTTAAGAACAAAGAGAAGGAAAGCACATGTGCTGCGAACAATCTCATCATTAGCATTACATCAAAAAGAGCTAGCTCAACGAATGGCTA : 1613  
H30\_NKorea\_refsequen : GAAGCTACCGCCAATCGTTAAGAACAAAGAGAAGGAAAGCACATGTGCTGCGAACAATCTCATCATTAGCATTACATCAAAAAGAGCTAGCTCAACGAATGGCTA : 1523  
H31\_P.vivax01\_refseq : GAAGCTACCGCCAATCGTTAAGAACAAAGAGAAGGAAAGCACATGTGCTGCGAACAATCTCATCATTAGCATTACATCAAAAAGAGCTAGCTCAACGAATGGCTA : 1604  
H32\_Brazil-I\_refsequ : GAAGCTACCGCCAATCGTTAAGAACAAAGAGAAGGAAAGCACATGTGCTGCGAACAATCTCATCATTAGCATTACATCAAAAAGAGCTAGCTCAACGAATGGCTA : 1532

1880 \* 1900 \* 1920 \* 1940 \* 1960 \*  
H1\_VCG : TCATGTTGCGAAAAATGGCTAGCTCCAGAAGAATACGGGTCTGTGCTCGATTTAGATAAAAAGCATAGAATTTAAATGTCTCTGCGCAGGGGCACCTATCCTAGTA : 1636  
H2 : TCATGTTGCGAAAAATGGCTAGCTCCAGAAGAATACGGGTCTGTGCTCGATTTAGATAAAAAGCATAGAATTTAAATGTCTCTGCGCAGGGGCACCTATCCTAGTA : 1672  
H3 : TCATGTTGCGAAAAATGGCTAGCTCCAGAAGAATACGGGTCTGTGCTCGATTTAGATAAAAAGCATAGAATTTAAATGTCTCTGCGCAGGGGCACCTATCCTAGTA : 1744  
H4 : TCATGTTGCGAAAAATGGCTAGCTCCAGAAGAATACGGGTCTGTGCTCGATTTAGATAAAAAGCATAGAATTTAAATGTCTCTGCGCAGGGGCACCTATCCTAGTA : 1708  
H5 : TCATGTTGCGAAAAATGGCTAGCTCCAGAAGAATACGGGTCTGTGCTCGATTTAGATAAAAAGCATAGAATTTAAATGTCTCTGCGCAGGGGCACCTATCCTAGTA : 1708  
H6 : TCATGTTGCGAAAAATGGCTAGCTCCAGAAGAATACGGGTCTGTGCTCGATTTAGATAAAAAGCATAGAATTTAAATGTCTCTGCGCAGGGGCACCTATCCTAGTA : 1627  
H7 : TCATGTTGCGAAAAATGGCTAGCTCCAGAAGAATACGGGTCTGTGCTCGATTTAGATAAAAAGCATAGAATTTAAATGTCTCTGCGCAGGGGCACCTATCCTAGTA : 1645  
H8 : TCATGTTGCGAAAAATGGCTAGCTCCAGAAGAATACGGGTCTGTGCTCGATTTAGATAAAAAGCATAGAATTTAAATGTCTCTGCGCAGGGGCACCTATCCTAGTA : 1681  
H9 : TCATGTTGCGAAAAATGGCTAGCTCCAGAAGAATACGGGTCTGTGCTCGATTTAGATAAAAAGCATAGAATTTAAATGTCTCTGCGCAGGGGCACCTATCCTAGTA : 1763  
H10 : TCATGTTGCGAAAAATGGCTAGCTCCAGAAGAATACGGGTCTGTGCTCGATTTAGATAAAAAGCATAGAATTTAAATGTCTCTGCGCAGGGGCACCTATCCTAGTA : 1681  
H11 : TCATGTTGCGAAAAATGGCTAGCTCCAGAAGAATACGGGTCTGTGCTCGATTTAGATAAAAAGCATAGAATTTAAATGTCTCTGCGCAGGGGCACCTATCCTAGTA : 1690  
H12 : TCATGTTGCGAAAAATGGCTAGCTCCAGAAGAATACGGGTCTGTGCTCGATTTAGATAAAAAGCATAGAATTTAAATGTCTCTGCGCAGGGGCACCTATCCTAGTA : 1672



H28\_Ctg\_refsequence : CAGCAATGGAAATATTACCAAAACATGTTAGGGTTCGAAACGGGAAATGAACATGCCTTCTTAAACCTCATCGATGAGTTGCTAGTCATCGACAAGAGACACAG : 1821  
H29\_Salvador-I\_refse : CAGCAATGGAAATATTACCAAAACATGTTAGGGTTCGAAACGGGAAATGAACATGCCTTCTTAAACCTCATCGATGAGTTGCTAGTCATCGACAAGAGACACAG : 1821  
H30\_NKorea\_refsequen : CAGCAATGGAAATATTACCAAAACATGTTAGGGTTCGAAACGGGAAATGAACATGCCTTCTTAAACCTCATCGATGAGTTGCTAGTCATCGACAAGAGACACAG : 1731  
H31\_P.vivax01\_refseq : CAGCAATGGAAATATTACCAAAACATGTTAGGGTTCGAAACGGGAAATGAACATGCCTTCTTAAACCTCATCGATGAGTTGCTAGTCATCGACAAGAGACACAG : 1812  
H32\_Brazil-I\_refsequ : CAGCAATGGAAATATTACCAAAACATGTTAGGGTTCGAAACGGGAAATGAACATGCCTTCTTAAACCTCATCGATGAGTTGCTAGTCATCGACAAGAGACACAG : 1740  
CAGCAATGGAAATATTACCAAAACATGTTAGGGTTCGAAACGGGAAATGAACATGCCTTCTTAAACCTCATCGATGAGTTGCTAGTCATCGACAAGAGACACAG

\* 2100 \* 2120 \* 2140 \* 2160 \* 2180  
H1\_VCG : TAACAATGAAGCGTATTCAAAAGTGATAAGGAAAATAAAAAAATCGAAAGCCTTTAATTATTGTACTAAAGTTATGAGGATTGCAGGGAATATTTCTTCCATTC : 1844  
H2 : TAACAATGAAGCGTATTCAAAAGTGATAAGGAAAATAAAAAAATCGAAAGCCTTTAATTATTGTACTAAAGTTATGAGGATTGCAGGGAATATTTCTTCCATTC : 1880  
H3 : TAACAATGAAGCGTATTCAAAAGTGATAAGGAAAATAAAAAAATCGAAAGCCTTTAATTATTGTACTAAAGTTATGAGGATTGCAGGGAATATTTCTTCCATTC : 1952  
H4 : TAACAATGAAGCGTATTCAAAAGTGATAAGGAAAATAAAAAAATCGAAAGCCTTTAATTATTGTACTAAAGTTATGAGGATTGCAGGGAATATTTCTTCCATTC : 1916  
H5 : TAACAATGAAGCGTATTCAAAAGTGATAAGGAAAATAAAAAAATCGAAAGCCTTTAATTATTGTACTAAAGTTATGAGGATTGCAGGGAATATTTCTTCCATTC : 1916  
H6 : TAACAATGAAGCGTATTCAAAAGTGATAAGGAAAATAAAAAAATCGAAAGCCTTTAATTATTGTACTAAAGTTATGAGGATTGCAGGGAATATTTCTTCCATTC : 1835  
H7 : TAACAATGAAGCGTATTCAAAAGTGATAAGGAAAATAAAAAAATCGAAAGCCTTTAATTATTGTACTAAAGTTATGAGGATTGCAGGGAATATTTCTTCCATTC : 1853  
H8 : TAACAATGAAGCGTATTCAAAAGTGATAAGGAAAATAAAAAAATCGAAAGCCTTTAATTATTGTACTAAAGTTATGAGGATTGCAGGGAATATTTCTTCCATTC : 1889  
H9 : TAACAATGAAGCGTATTCAAAAGTGATAAGGAAAATAAAAAAATCGAAAGCCTTTAATTATTGTACTAAAGTTATGAGGATTGCAGGGAATATTTCTTCCATTC : 1971  
H10 : TAACAATGAAGCGTATTCAAAAGTGATAAGGAAAATAAAAAAATCGAAAGCCTTTAATTATTGTACTAAAGTTATGAGGATTGCAGGGAATATTTCTTCCATTC : 1889  
H11 : TAACAATGAAGCGTATTCAAAAGTGATAAGGAAAATAAAAAAATCGAAAGCCTTTAATTATTGTACTAAAGTTATGAGGATTGCAGGGAATATTTCTTCCATTC : 1898  
H12 : TAACAATGAAGCGTATTCAAAAGTGATAAGGAAAATAAAAAAATCGAAAGCCTTTAATTATTGTACTAAAGTTATGAGGATTGCAGGGAATATTTCTTCCATTC : 1880  
H13 : TAACAATGAAGCGTATTCAAAAGTGATAAGGAAAATAAAAAAATCGAAAGCCTTTAATTATTGTACTAAAGTTATGAGGATTGCAGGGAATATTTCTTCCATTC : 1952  
H14 : TAACAATGAAGCGTATTCAAAAGTGATAAGGAAAATAAAAAAATCGAAAGCCTTTAATTATTGTACTAAAGTTATGAGGATTGCAGGGAATATTTCTTCCATTC : 1898  
H15 : TAACAATGAAGCGTATTCAAAAGTGATAAGGAAAATAAAAAAATCGAAAGCCTTTAATTATTGTACTAAAGTTATGAGGATTGCAGGGAATATTTCTTCCATTC : 1880  
H16 : TAACAATGAAGCGTATTCAAAAGTGATAAGGAAAATAAAAAAATCGAAAGCCTTTAATTATTGTACTAAAGTTATGAGGATTGCAGGGAATATTTCTTCCATTC : 1844  
H17 : TAACAATGAAGCGTATTCAAAAGTGATAAGGAAAATAAAAAAATCGAAAGCCTTTAATTATTGTACTAAAGTTATGAGGATTGCAGGGAATATTTCTTCCATTC : 2060  
H18 : TAACAATGAAGCGTATTCAAAAGTGATAAGGAAAATAAAAAAATCGAAAGCCTTTAATTATTGTACTAAAGTTATGAGGATTGCAGGGAATATTTCTTCCATTC : 1844  
H19 : TAACAATGAAGCGTATTCAAAAGTGATAAGGAAAATAAAAAAATCGAAAGCCTTTAATTATTGTACTAAAGTTATGAGGATTGCAGGGAATATTTCTTCCATTC : 1898  
H20 : TAACAATGAAGCGTATTCAAAAGTGATAAGGAAAATAAAAAAATCGAAAGCCTTTAATTATTGTACTAAAGTTATGAGGATTGCAGGGAATATTTCTTCCATTC : 1880  
H21 : TAACAATGAAGCGTATTCAAAAGTGATAAGGAAAATAAAAAAATCGAAAGCCTTTAATTATTGTACTAAAGTTATGAGGATTGCAGGGAATATTTCTTCCATTC : 1916  
H22 : TAACAATGAAGCGTATTCAAAAGTGATAAGGAAAATAAAAAAATCGAAAGCCTTTAATTATTGTACTAAAGTTATGAGGATTGCAGGGAATATTTCTTCCATTC : 1880  
H23 : TAACAATGAAGCGTATTCAAAAGTGATAAGGAAAATAAAAAAATCGAAAGCCTTTAATTATTGTACTAAAGTTATGAGGATTGCAGGGAATATTTCTTCCATTC : 1916  
H24 : TAACAATGAAGCGTATTCAAAAGTGATAAGGAAAATAAAAAAATCGAAAGCCTTTAATTATTGTACTAAAGTTATGAGGATTGCAGGGAATATTTCTTCCATTC : 1925  
H25 : TAACAATGAAGCGTATTCAAAAGTGATAAGGAAAATAAAAAAATCGAAAGCCTTTAATTATTGTACTAAAGTTATGAGGATTGCAGGGAATATTTCTTCCATTC : 1880  
H26\_Mauritania-I\_ref : TAACAATGAAGCGTATTCAAAAGTGATAAGGAAAATAAAAAAATCGAAAGCCTTTAATTATTGTACTAAAGTTATGAGGATTGCAGGGAATATTTCTTCCATTC : 1970  
H27\_India-VII\_refseq : TAACAATGAAGCGTATTCAAAAGTGATAAGGAAAATAAAAAAATCGAAAGCCTTTAATTATTGTACTAAAGTTATGAGGATTGCAGGGAATATTTCTTCCATTC : 1853  
H28\_Ctg\_refsequence : TAACAATGAAGCGTATTCAAAAGTGATAAGGAAAATAAAAAAATCGAAAGCCTTTAATTATTGTACTAAAGTTATGAGGATTGCAGGGAATATTTCTTCCATTC : 1925  
H29\_Salvador-I\_refse : TAACAATGAAGCGTATTCAAAAGTGATAAGGAAAATAAAAAAATCGAAAGCCTTTAATTATTGTACTAAAGTTATGAGGATTGCAGGGAATATTTCTTCCATTC : 1925  
H30\_NKorea\_refsequen : TAACAATGAAGCGTATTCAAAAGTGATAAGGAAAATAAAAAAATCGAAAGCCTTTAATTATTGTACTAAAGTTATGAGGATTGCAGGGAATATTTCTTCCATTC : 1835  
H31\_P.vivax01\_refseq : TAACAATGAAGCGTATTCAAAAGTGATAAGGAAAATAAAAAAATCGAAAGCCTTTAATTATTGTACTAAAGTTATGAGGATTGCAGGGAATATTTCTTCCATTC : 1916  
H32\_Brazil-I\_refsequ : TAACAATGAAGCGTATTCAAAAGTGATAAGGAAAATAAAAAAATCGAAAGCCTTTAATTATTGTACTAAAGTTATGAGGATTGCAGGGAATATTTCTTCCATTC : 1844  
TAACAATGAAGCGTATTCAAAAGTGATAAGGAAAATAAAAAAATCGAAAGCCTTTAATTATTGTACTAAAGTTATGAGGATTGCAGGGAATATTTCTTCCATTC

\* 2200 \* 2220 \* 2240 \* 2260 \* 2280  
H1\_VCG : CATTTAATCATGAAAATAATAAAACGCCTAGCTACTCCATCATCGGGTCGTTAGGTAACCTGGTGAAGGCTCACATGGGGAACACTACTACGTTGCCATTGCTAAT : 1948  
H2 : CATTTAATCATGAAAATAATAAAACGCCTAGCTACTCCATCATCGGGTCGTTAGGTAACCTGGTGAAGGCTCACATGGGGAACACTACTACGTTGCCATTGCTAAT : 1984  
H3 : CATTTAATCATGAAAATAATAAAACGCCTAGCTACTCCATCATCGGGTCGTTAGGTAACCTGGTGAAGGCTCACATGGGGAACACTACTACGTTGCCATTGCTAAT : 2056  
H4 : CATTTAATCATGAAAATAATAAAACGCCTAGCTACTCCATCATCGGGTCGTTAGGTAACCTGGTGAAGGCTCACATGGGGAACACTACTACGTTGCCATTGCTAAT : 2020  
H5 : CATTTAATCATGAAAATAATAAAACGCCTAGCTACTCCATCATCGGGTCGTTAGGTAACCTGGTGAAGGCTCACATGGGGAACACTACTACGTTGCCATTGCTAAT : 2020  
H6 : CATTTAATCATGAAAATAATAAAACGCCTAGCTACTCCATCATCGGGTCGTTAGGTAACCTGGTGAAGGCTCACATGGGGAACACTACTACGTTGCCATTGCTAAT : 1939  
H7 : CATTTAATCATGAAAATAATAAAACGCCTAGCTACTCCATCATCGGGTCGTTAGGTAACCTGGTGAAGGCTCACATGGGGAACACTACTACGTTGCCATTGCTAAT : 1957





H23 : AGGATTAACCTCTATTTGCTATGCCGAGAAGAGGAACAAAAAAGAGCCCTTAAAAGTTGTCTCCGTCTGTACTCTCCTTCATTTGACCCGACATGCTCCA : 2124  
H24 : AGGATTAACCTCTATTTGCTATGCCGAGAAGAGGAACAAAAAAGAGCCCTTAAAAGTTGTCTCCGTCTGTACTCTCCTTCATTTGACCCGACATGCTCCA : 2133  
H25 : AGGATTAACCTCTATTTGCTATGCCGAGAAGAGGAACAAAAAAGAGCCCTTAAAAGTTGTCTCCGTCTGTACTCTCCTTCATTTGACCCGACATGCTCCA : 2088  
H26\_Mauritania-I\_ref : AGGATTAACCTCTATTTGCTATGCCGAGAAGAGGAACAAAAAAGAGCCCTTAAAAGTTGTCTCCGTCTGTACTCTCCTTCATTTGACCCGACATGCTCCA : 2178  
H27\_India-VII\_refseq : AGGATTAACCTCTATTTGCTATGCCGAGAAGAGGAACAAAAAAGAGCCCTTAAAAGTTGTCTCCGTCTGTACTCTCCTTCATTTGACCCGACATGCTCCA : 2061  
H28\_Ctg\_refsequence : AGGATTAACCTCTATTTGCTATGCCGAGAAGAGGAACAAAAAAGAGCCCTTAAAAGTTGTCTCCGTCTGTACTCTCCTTCATTTGACCCGACATGCTCCA : 2133  
H29\_Salvador-I\_refseq : AGGATTAACCTCTATTTGCTATGCCGAGAAGAGGAACAAAAAAGAGCCCTTAAAAGTTGTCTCCGTCTGTACTCTCCTTCATTTGACCCGACATGCTCCA : 2133  
H30\_NKorea\_refsequen : AGGATTAACCTCTATTTGCTATGCCGAGAAGAGGAACAAAAAAGAGCCCTTAAAAGTTGTCTCCGTCTGTACTCTCCTTCATTTGACCCGACATGCTCCA : 2043  
H31\_P.vivax01\_refseq : AGGATTAACCTCTATTTGCTATGCCGAGAAGAGGAACAAAAAAGAGCCCTTAAAAGTTGTCTCCGTCTGTACTCTCCTTCATTTGACCCGACATGCTCCA : 2124  
H32\_Brazil-I\_refseq : AGGATTAACCTCTATTTGCTATGCCGAGAAGAGGAACAAAAAAGAGCCCTTAAAAGTTGTCTCCGTCTGTACTCTCCTTCATTTGACCCGACATGCTCCA : 2052  
AGGATTAACCTCTATTTGCTATGCCGAGAAGAGGAACAAAAAAGAGCCCTTAAAAGTTGTCTCCGTCTGTACTCTCCTTCATTTGACCCGACATGCTCCA

2400 \* 2420 \* 2440 \* 2460 \* 2480 \*  
H1\_VCG : CAATTGCTCTGATGAACATTTAAAGAATATTTTGGACCTCAACACTTTGAAGCTTAACATTCTGAACATGCAGGGCAGGCGCGTGTGCAGCCCCCTCGTCAAGA : 2156  
H2 : CAATTGCTCTGATGAACATTTAAAGAATATTTTGGACCTCAACACTTTGAAGCTTAACATTCTGAACATGCAGGGCAGGCGCGTGTGCAGCCCCCTCGTCAAGA : 2192  
H3 : CAATTGCTCTGATGAACATTTAAAGAATATTTTGGACCTCAACACTTTGAAGCTTAACATTCTGAACATGCAGGGCAGGCGCGTGTGCAGCCCCCTCGTCAAGA : 2264  
H4 : CAATTGCTCTGATGAACATTTAAAGAATATTTTGGACCTCAACACTTTGAAGCTTAACATTCTGAACATGCAGGGCAGGCGCGTGTGCAGCCCCCTCGTCAAGA : 2228  
H5 : CAATTGCTCTGATGAACATTTAAAGAATATTTTGGACCTCAACACTTTGAAGCTTAACATTCTGAACATGCAGGGCAGGCGCGTGTGCAGCCCCCTCGTCAAGA : 2228  
H6 : CAATTGCTCTGATGAACATTTAAAGAATATTTTGGACCTCAACACTTTGAAGCTTAACATTCTGAACATGCAGGGCAGGCGCGTGTGCAGCCCCCTCGTCAAGA : 2147  
H7 : CAATTGCTCTGATGAACATTTAAAGAATATTTTGGACCTCAACACTTTGAAGCTTAACATTCTGAACATGCAGGGCAGGCGCGTGTGCAGCCCCCTCGTCAAGA : 2165  
H8 : CAATTGCTCTGATGAACATTTAAAGAATATTTTGGACCTCAACACTTTGAAGCTTAACATTCTGAACATGCAGGGCAGGCGCGTGTGCAGCCCCCTCGTCAAGA : 2201  
H9 : CAATTGCTCTGATGAACATTTAAAGAATATTTTGGACCTCAACACTTTGAAGCTTAACATTCTGAACATGCAGGGCAGGCGCGTGTGCAGCCCCCTCGTCAAGA : 2283  
H10 : CAATTGCTCTGATGAACATTTAAAGAATATTTTGGACCTCAACACTTTGAAGCTTAACATTCTGAACATGCAGGGCAGGCGCGTGTGCAGCCCCCTCGTCAAGA : 2201  
H11 : CAATTGCTCTGATGAACATTTAAAGAATATTTTGGACCTCAACACTTTGAAGCTTAACATTCTGAACATGCAGGGCAGGCGCGTGTGCAGCCCCCTCGTCAAGA : 2210  
H12 : CAATTGCTCTGATGAACATTTAAAGAATATTTTGGACCTCAACACTTTGAAGCTTAACATTCTGAACATGCAGGGCAGGCGCGTGTGCAGCCCCCTCGTCAAGA : 2192  
H13 : CAATTGCTCTGATGAACATTTAAAGAATATTTTGGACCTCAACACTTTGAAGCTTAACATTCTGAACATGCAGGGCAGGCGCGTGTGCAGCCCCCTCGTCAAGA : 2264  
H14 : CAATTGCTCTGATGAACATTTAAAGAATATTTTGGACCTCAACACTTTGAAGCTTAACATTCTGAACATGCAGGGCAGGCGCGTGTGCAGCCCCCTCGTCAAGA : 2210  
H15 : CAATTGCTCTGATGAACATTTAAAGAATATTTTGGACCTCAACACTTTGAAGCTTAACATTCTGAACATGCAGGGCAGGCGCGTGTGCAGCCCCCTCGTCAAGA : 2192  
H16 : CAATTGCTCTGATGAACATTTAAAGAATATTTTGGACCTCAACACTTTGAAGCTTAACATTCTGAACATGCAGGGCAGGCGCGTGTGCAGCCCCCTCGTCAAGA : 2156  
H17 : CAATTGCTCTGATGAACATTTAAAGAATATTTTGGACCTCAACACTTTGAAGCTTAACATTCTGAACATGCAGGGCAGGCGCGTGTGCAGCCCCCTCGTCAAGA : 2372  
H18 : CAATTGCTCTGATGAACATTTAAAGAATATTTTGGACCTCAACACTTTGAAGCTTAACATTCTGAACATGCAGGGCAGGCGCGTGTGCAGCCCCCTCGTCAAGA : 2156  
H19 : CAATTGCTCTGATGAACATTTAAAGAATATTTTGGACCTCAACACTTTGAAGCTTAACATTCTGAACATGCAGGGCAGGCGCGTGTGCAGCCCCCTCGTCAAGA : 2210  
H20 : CAATTGCTCTGATGAACATTTAAAGAATATTTTGGACCTCAACACTTTGAAGCTTAACATTCTGAACATGCAGGGCAGGCGCGTGTGCAGCCCCCTCGTCAAGA : 2192  
H21 : CAATTGCTCTGATGAACATTTAAAGAATATTTTGGACCTCAACACTTTGAAGCTTAACATTCTGAACATGCAGGGCAGGCGCGTGTGCAGCCCCCTCGTCAAGA : 2228  
H22 : CAATTGCTCTGATGAACATTTAAAGAATATTTTGGACCTCAACACTTTGAAGCTTAACATTCTGAACATGCAGGGCAGGCGCGTGTGCAGCCCCCTCGTCAAGA : 2192  
H23 : CAATTGCTCTGATGAACATTTAAAGAATATTTTGGACCTCAACACTTTGAAGCTTAACATTCTGAACATGCAGGGCAGGCGCGTGTGCAGCCCCCTCGTCAAGA : 2228  
H24 : CAATTGCTCTGATGAACATTTAAAGAATATTTTGGACCTCAACACTTTGAAGCTTAACATTCTGAACATGCAGGGCAGGCGCGTGTGCAGCCCCCTCGTCAAGA : 2237  
H25 : CAATTGCTCTGATGAACATTTAAAGAATATTTTGGACCTCAACACTTTGAAGCTTAACATTCTGAACATGCAGGGCAGGCGCGTGTGCAGCCCCCTCGTCAAGA : 2192  
H26\_Mauritania-I\_ref : CAATTGCTCTGATGAACATTTAAAGAATATTTTGGACCTCAACACTTTGAAGCTTAACATTCTGAACATGCAGGGCAGGCGCGTGTGCAGCCCCCTCGTCAAGA : 2282  
H27\_India-VII\_refseq : CAATTGCTCTGATGAACATTTAAAGAATATTTTGGACCTCAACACTTTGAAGCTTAACATTCTGAACATGCAGGGCAGGCGCGTGTGCAGCCCCCTCGTCAAGA : 2165  
H28\_Ctg\_refsequence : CAATTGCTCTGATGAACATTTAAAGAATATTTTGGACCTCAACACTTTGAAGCTTAACATTCTGAACATGCAGGGCAGGCGCGTGTGCAGCCCCCTCGTCAAGA : 2237  
H29\_Salvador-I\_refseq : CAATTGCTCTGATGAACATTTAAAGAATATTTTGGACCTCAACACTTTGAAGCTTAACATTCTGAACATGCAGGGCAGGCGCGTGTGCAGCCCCCTCGTCAAGA : 2237  
H30\_NKorea\_refsequen : CAATTGCTCTGATGAACATTTAAAGAATATTTTGGACCTCAACACTTTGAAGCTTAACATTCTGAACATGCAGGGCAGGCGCGTGTGCAGCCCCCTCGTCAAGA : 2147  
H31\_P.vivax01\_refseq : CAATTGCTCTGATGAACATTTAAAGAATATTTTGGACCTCAACACTTTGAAGCTTAACATTCTGAACATGCAGGGCAGGCGCGTGTGCAGCCCCCTCGTCAAGA : 2228  
H32\_Brazil-I\_refseq : CAATTGCTCTGATGAACATTTAAAGAATATTTTGGACCTCAACACTTTGAAGCTTAACATTCTGAACATGCAGGGCAGGCGCGTGTGCAGCCCCCTCGTCAAGA : 2156  
CAATTGCTCTGATGAACATTTAAAGAATATTTTGGACCTCAACACTTTGAAGCTTAACATTCTGAACATGCAGGGCAGGCGCGTGTGCAGCCCCCTCGTCAAGA

2500 \* 2520 \* 2540 \* 2560 \* 2580 \* 2600  
H1\_VCG : TGAGCTTCTCGGGCGCGCAGAACCCCGCCCTCAAGGAGATCTGCGAGCCGAGCAACCACCTAGTGGGTGAGTGACGGGGGGGGCGGACCTCCATGGGGGGCT : 2260  
H2 : TGAGCTTCTCGGGCGCGCAGAACCCCGCCCTCAAGGAGATCTGCGAGCCGAGCAACCACCTAGTGGGTGAGTGACGGGGGGGGCGGACCTCCATGGGGGGCT : 2296





ACCGCCTTCTTTACCCCCCTCAGACGAGACccTCTCCAAGCTGCTCAACCTGCTCTCGACCGGTTTCGCACGAACCTCTCGGGCCGAGGTGGAAAAGCGCGGC

```
*      2820      *      2840      *      2860      *      2880      *      2900      *
H1_VCG : TTCGACGAGGACTACATCCAGGAGGAAATCAAAAACATAAACGAAAGCGACAACAACGTTTCGGGACAAGGGCGAAGACGAAGTGGAAAATCTCATTTTTGAAGA : 2572
H2      : TTCGACGAGGACTACATCCAGGAGGAAATCAAAAACATAAACGAAAGCGACAACAACGTTTCGGGACAAGGGCGAAGACGAAGTGGAAAATCTCATTTTTGAAGA : 2608
H3      : TTCGACGAGGACTACATCCAGGAGGAAATCAAAAACATAAACGAAAGCGACAACAACGTTTCGGGACAAGGGCGAAGACGAAGTGGAAAATCTCATTTTTGAAGA : 2680
H4      : TTCGACGAGGACTACATCCAGGAGGAAATCAAAAACATAAACGAAAGCGACAACAACGTTTCGGGACAAGGGCGAAGACGAAGTGGAAAATCTCATTTTTGAAGA : 2644
H5      : TTCGACGAGGACTACATCCAGGAGGAAATCAAAAACATAAACGAAAGCGACAACAACGTTTCGGGACAAGGGCGAAGACGAAGTGGAAAATCTCATTTTTGAAGA : 2644
H6      : TTCGACGAGGACTACATCCAGGAGGAAATCAAAAACATAAACGAAAGCGACAACAACGTTTCGGGACAAGGGCGAAGACGAAGTGGAAAATCTCATTTTTGAAGA : 2563
H7      : TTCGACGAGGACTACATCCAGGAGGAAATCAAAAACATAAACGAAAGCGACAACAACGTTTCGGGACAAGGGCGAAGACGAAGTGGAAAATCTCATTTTTGAAGA : 2581
H8      : TTCGACGAGGACTACATCCAGGAGGAAATCAAAAACATAAACGAAAGCGACAACAACGTTTCGGGACAAGGGCGAAGACGAAGTGGAAAATCTCATTTTTGAAGA : 2617
H9      : TTCGACGAGGACTACATCCAGGAGGAAATCAAAAACATAAACGAAAGCGACAACAACGTTTCGGGACAAGGGCGAAGACGAAGTGGAAAATCTCATTTTTGAAGA : 2699
H10     : TTCGACGAGGACTACATCCAGGAGGAAATCAAAAACATAAACGAAAGCGACAACAACGTTTCGGGACAAGGGCGAAGACGAAGTGGAAAATCTCATTTTTGAAGA : 2617
H11     : TTCGACGAGGACTACATCCAGGAGGAAATCAAAAACATAAACGAAAGCGACAACAACGTTTCGGGACAAGGGCGAAGACGAAGTGGAAAATCTCATTTTTGAAGA : 2626
H12     : TTCGACGAGGACTACATCCAGGAGGAAATCAAAAACATAAACGAAAGCGACAACAACGTTTCGGGACAAGGGCGAAGACGAAGTGGAAAATCTCATTTTTGAAGA : 2608
H13     : TTCGACGAGGACTACATCCAGGAGGAAATCAAAAACATAAACGAAAGCGACAACAACGTTTCGGGACAAGGGCGAAGACGAAGTGGAAAATCTCATTTTTGAAGA : 2680
H14     : TTCGACGAGGACTACATCCAGGAGGAAATCAAAAACATAAACGAAAGCGACAACAACGTTTCGGGACAAGGGCGAAGACGAAGTGGAAAATCTCATTTTTGAAGA : 2626
H15     : TTCGACGAGGACTACATCCAGGAGGAAATCAAAAACATAAACGAAAGCGACAACAACGTTTCGGGACAAGGGCGAAGACGAAGTGGAAAATCTCATTTTTGAAGA : 2608
H16     : TTCGACGAGGACTACATCCAGGAGGAAATCAAAAACATAAACGAAAGCGACAACAACGTTTCGGGACAAGGGCGAAGACGAAGTGGAAAATCTCATTTTTGAAGA : 2572
H17     : TTCGACGAGGACTACATCCAGGAGGAAATCAAAAACATAAACGAAAGCGACAACAACGTTTCGGGACAAGGGCGAAGACGAAGTGGAAAATCTCATTTTTGAAGA : 2788
H18     : TTCGACGAGGACTACATCCAGGAGGAAATCAAAAACATAAACGAAAGCGACAACAACGTTTCGGGACAAGGGCGAAGACGAAGTGGAAAATCTCATTTTTGAAGA : 2572
H19     : TTCGACGAGGACTACATCCAGGAGGAAATCAAAAACATAAACGAAAGCGACAACAACGTTTCGGGACAAGGGCGAAGACGAAGTGGAAAATCTCATTTTTGAAGA : 2626
H20     : TTCGACGAGGACTACATCCAGGAGGAAATCAAAAACATAAACGAAAGCGACAACAACGTTTCGGGACAAGGGCGAAGACGAAGTGGAAAATCTCATTTTTGAAGA : 2608
H21     : TTCGACGAGGACTACATCCAGGAGGAAATCAAAAACATAAACGAAAGCGACAACAACGTTTCGGGACAAGGGCGAAGACGAAGTGGAAAATCTCATTTTTGAAGA : 2644
H22     : TTCGACGAGGACTACATCCAGGAGGAAATCAAAAACATAAACGAAAGCGACAACAACGTTTCGGGACAAGGGCGAAGACGAAGTGGAAAATCTCATTTTTGAAGA : 2608
H23     : TTCGACGAGGACTACATCCAGGAGGAAATCAAAAACATAAACGAAAGCGACAACAACGTTTCGGGACAAGGGCGAAGACGAAGTGGAAAATCTCATTTTTGAAGA : 2644
H24     : TTCGACGAGGACTACATCCAGGAGGAAATCAAAAACATAAACGAAAGCGACAACAACGTTTCGGGACAAGGGCGAAGACGAAGTGGAAAATCTCATTTTTGAAGA : 2653
H25     : TTCGACGAGGACTACATCCAGGAGGAAATCAAAAACATAAACGAAAGCGACAACAACGTTTCGGGACAAGGGCGAAGACGAAGTGGAAAATCTCATTTTTGAAGA : 2608
H26_Mauritania-I_ref : TTCGACGAGGACTACATCCAGGAGGAAATCAAAAACATAAACGAAAGCGACAACAACGTTTCGGGACAAGGGCGAAGACGAAGTGGAAAATCTCATTTTTGAAGA : 2698
H27_India-VII_refseq : TTCGACGAGGACTACATCCAGGAGGAAATCAAAAACATAAACGAAAGCGACAACAACGTTTCGGGACAAGGGCGAAGACGAAGTGGAAAATCTCATTTTTGAAGA : 2581
H28_Ctg_refsequence : TTCGACGAGGACTACATCCAGGAGGAAATCAAAAACATAAACGAAAGCGACAACAACGTTTCGGGACAAGGGCGAAGACGAAGTGGAAAATCTCATTTTTGAAGA : 2653
H29_Salvador-I_refse : TTCGACGAGGACTACATCCAGGAGGAAATCAAAAACATAAACGAAAGCGACAACAACGTTTCGGGACAAGGGCGAAGACGAAGTGGAAAATCTCATTTTTGAAGA : 2653
H30_NKorea_refsequen : TTCGACGAGGACTACATCCAGGAGGAAATCAAAAACATAAACGAAAGCGACAACAACGTTTCGGGACAAGGGCGAAGACGAAGTGGAAAATCTCATTTTTGAAGA : 2563
H31_P.vivax01_refseq : TTCGACGAGGACTACATCCAGGAGGAAATCAAAAACATAAACGAAAGCGACAACAACGTTTCGGGACAAGGGCGAAGACGAAGTGGAAAATCTCATTTTTGAAGA : 2644
H32_Brazil-I_refsequ : TTCGACGAGGACTACATCCAGGAGGAAATCAAAAACATAAACGAAAGCGACAACAACGTTTCGGGACAAGGGCGAAGACGAAGTGGAAAATCTCATTTTTGAAGA : 2572
TTCGACGAGGACTACATCCAGGAGGAAATCAAAAACATAAACGAAAGCGACAACAACGTTTCGGGACAAGGGCGAAGACGAAGTGGAAAATCTCATTTTTGAAGA
```

```
H1_VCG : CTTGTGA : 2579
H2      : CTTGTGA : 2615
H3      : CTTGTGA : 2687
H4      : CTTGTGA : 2651
H5      : CTTGTGA : 2651
H6      : CTTGTGA : 2570
H7      : CTTGTGA : 2588
H8      : CTTGTGA : 2624
H9      : CTTGTGA : 2706
H10     : CTTGTGA : 2624
H11     : CTTGTGA : 2633
H12     : CTTGTGA : 2615
```

|                      |   |         |   |      |
|----------------------|---|---------|---|------|
| H13                  | : | CTTGTGA | : | 2687 |
| H14                  | : | CTTGTGA | : | 2633 |
| H15                  | : | CTTGTGA | : | 2615 |
| H16                  | : | CTTGTGA | : | 2579 |
| H17                  | : | CTTGTGA | : | 2795 |
| H18                  | : | CTTGTGA | : | 2579 |
| H19                  | : | CTTGTGA | : | 2633 |
| H20                  | : | CTTGTGA | : | 2615 |
| H21                  | : | CTTGTGA | : | 2651 |
| H22                  | : | CTTGTGA | : | 2615 |
| H23                  | : | CTTGTGA | : | 2651 |
| H24                  | : | CTTGTGA | : | 2660 |
| H25                  | : | CTTGTGA | : | 2615 |
| H26_Mauritania-I_ref | : | CTTGTGA | : | 2705 |
| H27_India-VII_refseq | : | CTTGTGA | : | 2588 |
| H28_Ctg_refsequence  | : | CTTGTGA | : | 2660 |
| H29_Salvador-I_refse | : | CTTGTGA | : | 2660 |
| H30_NKorea_refsequen | : | CTTGTGA | : | 2570 |
| H31_P.vivax01_refseq | : | CTTGTGA | : | 2651 |
| H32_Brazil-I_refsequ | : | CTTGTGA | : | 2579 |
|                      |   | CTTGTGA |   |      |
