# Supplementary material for: Size polymorphism and low sequence diversity in the locus encoding the Plasmodium vivax rhoptry neck protein 4 (PvRON4) in Colombian isolates
Source: Springer Nature journal article supplement (doi:10.1186/s12936-016-1563-4), 2016-10-18
Supplement: MOESM4 [file 10899172]

**Size polymorphism and low sequence diversity in the locus encoding the *Plasmodium vivax* rhoptry neck protein 4 (PvRON4) in Colombian isolates**

|           | Chocó          | Nariño         | Antioquia      | Córdoba | Amazonas |
|-----------|----------------|----------------|----------------|---------|----------|
| Chocó     |                | 0.00195        | 0.22656        | 0.19336 | 0.05176  |
| Nariño    | <b>0.40062</b> |                | 0.02930        | 0.05273 | 0.00879  |
| Antioquia | 0.04272        | <b>0.28000</b> |                | 0.43555 | 0.01172  |
| Córdoba   | 0.02428        | 0.13422        | -0.01859       |         | 0.07715  |
| Amazonas  | 0.09516        | <b>0.27552</b> | <b>0.22928</b> | 0.05302 |          |

**Additional file 4. Inter-population  $F_{ST}$  statistic for *pvrn4* per department**  $F_{ST}$  was calculated for parasite subpopulations in Colombia. Values close to 0 indicate low genetic differentiation whilst values close to 1 indicate high genetic differentiation. Values below the diagonal indicate the  $F_{ST}$  value and those above the diagonal represent the p-values. Values in bold indicate significant differences having  $p < 0.03$ .
